1 Atrial fibrillation and mortality in critically ill patients undergoing  
2 emergent fixed-wing air ambulance transport: a retrospective  
3 cohort study

4

5 **RUNNING TITLE: Atrial fibrillation and mortality in critical care patient transport**

6

7 Marcus Fredriksson Sundbom\* [marcus.fredriksson.sundbom@umu.se](mailto:marcus.fredriksson.sundbom@umu.se)

8 Hannah Langelotz [hannah.bassek@gmail.com](mailto:hannah.bassek@gmail.com)

9 Helena Nyström [helena.nystrom@umu.se](mailto:helena.nystrom@umu.se)

10 Roman A'roch [roman.aroch@umu.se](mailto:roman.aroch@umu.se)

11 Michael Haney [michael.haney@umu.se](mailto:michael.haney@umu.se)

12 \*Corresponding author

13

14 Department of Surgical and Perioperative Sciences, Anesthesiology and Intensive Care Medicine,

15 Umeå University, Umeå, Sweden

16 **Word count: 1128**

17 **Keywords: Critical care, Atrial fibrillation, Mortality, Air Ambulances, Epidemiology**

18

## 19 Abstract

### 20 Objective

21 To examine if atrial fibrillation at the time of emergency transport to tertiary care hospital by air  
22 ambulance is associated with increased mortality risk.

### 23 Design

24 Retrospective cohort study. Logistic regression and Cox regression were used to assess associations  
25 of condition with outcome (mortality). Propensity score matching (1:1) was used to identify the  
26 comparison cases.

### 27 Setting

28 One tertiary care centre in sparsely populated northern Sweden

### 29 Participants

30 Critical care cases undergoing emergent fixed-wing air transport in the northern healthcare region of  
31 Sweden was included. 2143 cases were included in the study between 2000-2016.

### 32 Primary and secondary outcomes measures

33 The primary outcome was mortality risk at 90-days post transport in cases with atrial fibrillation  
34 during the fixed-wing air ambulance transport. The secondary outcome measures were vasopressor  
35 and impaired oxygenation was associated with mortality at 90-days post transport.

### 36 Results

37 Atrial fibrillation showed a higher 90-day post transport mortality risk estimate in the multivariate  
38 analysis of all cases, hazard ratio (HR) 1.70 (95% CI 1.08-2.67,  $p=0.022$ ). In a propensity matched  
39 analysis, no increased mortality risk for atrial fibrillation was observed at the same time interval with  
40 hazard ratio 1.22 (0.65-2.27,  $p=0.536$ ). In the secondary analysis, vasopressor use was associated  
41 with atrial fibrillation at the time of transport whereas impaired oxygenation was not associated with  
42 an increased risk of atrial fibrillation.

## 43 Conclusion

44 No increased mortality risk at 90 days was seen for cases with atrial fibrillation at time of transport in  
45 this cohort using a propensity score matched approach.

## 46 Article summary

### 47 Strengths and limitations

- 48 • Explores the scarcely studied topic of mortality risk and atrial fibrillation at time of transport
- 49 with fixed-wing air ambulance
- 50 • Quasi-experimental approach with propensity score matching to handle selection bias
- 51 • No co-morbidity and disease severity data which risk confounding results
- 52 • A single transport system was studied which limits generalizability

53

54

## 55 Introduction

56 Atrial fibrillation (AFib) is the most common cardiac arrhythmia among high income countries and is  
57 associated with an increased risk of stroke, heart failure and mortality[1]. Advanced age, genetics  
58 and an unhealthy lifestyle can predispose an individual to develop AFib, and patients typically  
59 present with palpitations, dyspnea, chest pain and/or near syncope [2].

60

61 AFib is common in critically ill patients, and has been reported to be present in more than one fourth  
62 of patients at some point during intensive care treatment[3]. It has been suggested as a predictor of  
63 increased mortality risk independent of disease severity and co-morbidity [4–8], especially if the AFib  
64 is new-onset[9–11]. Some studies suggest AFib is associated with severity of illness but not  
65 mortality[12]. Risk factors for developing new-onset AFib include for example patient age, fluid  
66 overload, hypoxemia, hypotension, admission diagnosis and vasopressor use[13]. Several strategies  
67 to manage AFib in the ICU can be deployed, such as rhythm control, rate control or  
68 pharmacological/electrical cardioversion[14]. However, a recent study reported that the most  
69 common strategy amongst ICU doctors in hemodynamically stable ICU patients was observation[15].

70

71 Air ambulance transport is common for transport of emergency intensive care cases if there are long  
72 distances to tertiary care hospitals. Little is reported about how common AFib is in this group of  
73 patients. It is not known if AFib at the time of transport is associated with increased later mortality.

74 We hypothesized that AFib would be associated with increased mortality at 90 days in a mixed  
75 cohort of critically ill patients undergoing emergency fixed-wing inter-hospital air ambulance transfer  
76 over long distance to tertiary care. A secondary hypothesis was that vasopressor use and impaired  
77 oxygenation would be associated with increased risk of AFib.

## 78 Material and methods

79 Intensive care cases that were transported in the northern healthcare region of Sweden by air  
80 ambulance between year 2000-2016 were included in the analysis, from a total of 3917 cases, with  
81 2143 meeting the inclusion criteria of being an emergent transport, >16 years of age, not transported  
82 for organ transplantation, and not missing mortality data. Patient charts for the air ambulance cohort  
83 was abstracted into a database, with patient data pseudonymized. Mortality data was obtained from  
84 the Swedish National Board of Health and Welfare and linked to the cases in the database.  
85 SpO<sub>2</sub>/FiO<sub>2</sub> (S/F) (blood oxygen measured by pulse oximetry/fraction of inspired oxygen) ratio was  
86 used as a surrogate for PaO<sub>2</sub> (partial pressure of oxygen in blood)/FiO<sub>2</sub>[16]. Impaired oxygenation  
87 was defined according to ARDS network guidelines[17], with cases with S/F ratio <300 regarded as  
88 having impaired oxygenation. Cases were divided into diagnostic groups according to the reason for  
89 initiating the transport.

90

91 Concerning analysis, summary statistics are presented with mean (range) for continuous variables  
92 and counts (percentages) for categorical variables. Logistic regression and Cox regression was used to  
93 assess association on mortality of various patient level factors and significance level set to alpha 0.05.  
94 Complete case analysis was used. All statistical analysis were made using SPSS 28 (IBM Corporation,  
95 Armonk, NY, USA) and forest plots were made using GraphPad Prism 9 (GraphPad Software, San  
96 Diego, CA, USA). Propensity score matching 1:1 was done in SPSS based on age, sex, mechanical  
97 ventilation, vasopressor, vasodilator, inotrope, oxygenation status and diagnostic group. These  
98 factors were either selected based on univariate and multivariate mortality risk assessment or by  
99 being clinically relevant factors for increased mortality which been previously reported [18].

100

101

102 **Results**

103 **Study population**

104 **Fig 1. Flowchart for patients included the analysis.**

| <b>Table 1. Characteristics of the cohort</b> |                            |                      |                                            |                              |
|-----------------------------------------------|----------------------------|----------------------|--------------------------------------------|------------------------------|
|                                               | <b>Unmatched</b>           |                      | <b>Propensity<br/>matched <sup>▲</sup></b> |                              |
|                                               | <b>Non AFib<br/>n=2064</b> | <b>AFib<br/>n=79</b> | <b>Non AFib<br/>n=78</b>                   | <b>* <math>\chi^2</math></b> |
| <b>Mean age (range)</b>                       | 57.1<br>(16.0-<br>95.6)    | 70.8<br>(41.2-86.9)  | 68.0 (43.7-92.3)                           | p=0.485                      |
| <b>Female n(%)</b>                            | 749 (36.3)                 | 15 (19.0)            | 15 (19.2)                                  | p=0.969                      |
| <b>Mechanical ventilation</b>                 | 582 (28.2)                 | 29 (36.7)            | 31 (39.7)                                  | P=0.696                      |
| <b>Vasopressor</b>                            | 305 (14.8)                 | 22 (27.8)            | 25 (32.1)                                  | P=0.565                      |
| <b>Vasodilator</b>                            | 326 (15.8)                 | 6 (7.6)              | 5 (6.4)                                    | P=0.771                      |
| <b>Inotrope</b>                               | 73 (3.5)                   | 8 (10.1)             | 6 (7.7)                                    | P=0.593                      |
| <b><u>Oxygenation status</u></b>              |                            |                      |                                            | df=4                         |
| <b>(SpO2/FiO2) n (%)</b>                      |                            |                      |                                            | P=0.834                      |
| <b>&lt;100</b>                                | 23 (1.1)                   | 2 (2.5)              | 2 (2.6)                                    |                              |
| <b>101-200</b>                                | 520 (25.2)                 | 20 (25.3)            | 19 (24.4)                                  |                              |

|                                                                                                                                                                                                                                                                              |                |           |           |                 |
|------------------------------------------------------------------------------------------------------------------------------------------------------------------------------------------------------------------------------------------------------------------------------|----------------|-----------|-----------|-----------------|
| <b>201-300</b>                                                                                                                                                                                                                                                               | 126 (6.1)      | 10 (12.7) | 14 (17.9) |                 |
| <b>&gt;300</b>                                                                                                                                                                                                                                                               | 1395<br>(67.6) | 47 (59.5) | 43 (55.1) |                 |
|                                                                                                                                                                                                                                                                              |                |           |           |                 |
| <b><u>Diagnostic group n (%)</u></b>                                                                                                                                                                                                                                         |                |           |           | df=4<br>p=0.883 |
| <b>Cardiopulmonary</b>                                                                                                                                                                                                                                                       | 800 (38.8)     | 31 (39.2) | 31 (39.7) |                 |
| <b>Neurosurgical/neurological</b>                                                                                                                                                                                                                                            | 557 (27.0)     | 28 (35.4) | 27 (34.6) |                 |
| <b>Trauma</b>                                                                                                                                                                                                                                                                | 397 (19.2)     | 9 (11.4)  | 8 (10.3)  |                 |
| <b>Surgical</b>                                                                                                                                                                                                                                                              | 137 (6.6)      | 5 (6.3)   | 3 (3.8)   |                 |
| <b>Infectious</b>                                                                                                                                                                                                                                                            | 68 (3.3)       | 6 (7.6)   | 9 (11.5)  |                 |
| <b>Internal medicine</b>                                                                                                                                                                                                                                                     | 43 (2.1)       | 0 (0)     | 0 (0)     |                 |
| <b>Other/unspecified</b>                                                                                                                                                                                                                                                     | 62 (3.0)       | 0 (0)     | 0 (0)     |                 |
| <p>▲Propensity matched on age, sex, mechanical ventilation, oxygenation status, vasopressor, vasodilator, inotrope and diagnostic group. * Pearson Chi2 test between AFib and propensity score matched non AFib. Degrees of freedom (df) = 1 unless indicated otherwise.</p> |                |           |           |                 |

105

106 2143 cases met the inclusion criteria and were included in the initial analysis (Table 1). Of these, 79  
 107 cases presented with AFib. Propensity matching was undertaken, and characteristics of this group is  
 108 presented in Table 1. Propensity score distribution is presented in Fig 2.

**Fig 2. Propensity score distribution.** Distribution of propensity score across the AFib and non AFib group

109

## 110 Mortality risk

111 An increased mortality risk for the AFib group at 90 days post transport was observed compared to  
112 non-AFib cases in the unmatched cohort (Fig S1), but could not be observed in the propensity-  
113 matched analysis using Cox regression, hazard ratio 1.22 (95% confidence interval (CI) 0.65-2.27,  
114  $p=0.536$ ).

115

**Fig 3. Logistic regression of exposures and AFib risk.** Crude represents univariate analysis  
whereas adjusted represents multivariate analysis with all included exposures

116

## 117 Risk of atrial fibrillation

118 When other conditions were analyzed in the unmatched cohort, the use of a vasopressor or inotrope  
119 was associated with an increased risk of AFib with odds ratio 2.09 (95% CI 1.23-3.53,  $p=0.006$ ) and  
120 2.82 (95% CI 1.26-6.31,  $p=0.012$ ) respectively (Fig 3.). Age and sex were also associated with an  
121 increased risk of AFib. Impaired oxygenation was not associated to an increased risk of AFib (Fig 3).

122

123

## 124 Discussion

125 In this study we found that AFib was not associated with increased mortality risk at 90 days using a  
126 propensity score matched approach. Several other studies of mixed cohorts of critically ill patients  
127 who report no increased mortality risk are in line with our findings [19–22]. A recent study focused  
128 on critically ill patients suffering from acute ischemic stroke found an increased crude ICU and in-  
129 hospital mortality risk which was not observed after propensity score matching[23]. Increased  
130 mortality risk for AFib is however frequently reported in critically ill patients with sepsis or post  
131 cardiothoracic surgery[4,10,24,25]. The prevalence of AFib was similar to what has been previously  
132 reported in mixed patient ICU cohorts[26]. Increased use of vasopressor and use of inotropic drugs  
133 has previously been associated with increased AFib risk which we also observed [27–29]. There was



134 no association between impaired oxygenation and AFib risk. Although an increased risk of AFib cases  
135 with impaired oxygenation has been previously reported, most recently in cases with severe COVID-  
136 19 [30–32], many patients (37%) in our cohort (pre-pandemic) had impaired oxygenation which may  
137 in part explain this disparity. Furthermore, the duration of impaired oxygenation may be different  
138 compared to other studies, but this cannot be assessed.

### 139 Limitations

140 This study had several limitations. First, there was no access to pre-ICU transport co-morbidity data.  
141 As a result, there could be adjustment only for the diagnosis which was the reason for initiating the  
142 transport. Second, conclusions about the nature of the AFib could not be drawn since information  
143 about pre-existing conditions was unavailable to us. Third, only one large regional transport system  
144 cases were studied, which limits generalizability of the findings. Another factor is that the cases in  
145 this study had all been pre-stabilized at sending hospital, and presumably resuscitation with some  
146 fluid therapy was initiated before the transport to treat hypovolemia. Fluid overload is associated  
147 with increased risk of AFib[33,34], but to assess to which extent the cases had received appropriate  
148 fluid therapy was beyond the scope of this study.

### 149 Conclusion

150 This study was able to analyze AFib-associated factors in the context of critical care transport by air  
151 ambulance in a regional cohort. AFib at the time of transport was not associated with increased  
152 mortality risk in this cohort. Risk of AFib was associated with use of vasopressor but not associated to  
153 impaired oxygenation, but no causal inference can be drawn from this analysis.

### 154 Conflict of interest

155 None

### 156 Funding

157 This work was supported by intramural funding from the County Healthcare Authority in  
158 Västerbotten for the study into Air Ambulance Intensive Care.

## 159 Author contributions

160 MFS primary responsible as guarantor. RA and MH was responsible for data collection and curation.

161 MFS, HL, MH, HN, RA conceptualization, analysis, interpretation and original draft.

## 162 Acknowledgements

163 We acknowledge the contribution of Göran Johansson for his role in data curation.

## 164 Data availability

165 Data from which the study is derived are available upon reasonable request from the corresponding

166 author. Data is not made immediately accessible because of Swedish privacy laws.

## 167 Ethics statements

### 168 Patient consent for publication

169 Not applicable

### 170 Ethical approval

171 Ethical permission was granted by the Swedish Ethical Review Authority (Dnr 2019-06525).

## 172 References

- 173 1 McManus DD, Rienstra M, Benjamin EJ. An Update on the Prognosis of Patients With Atrial  
174 Fibrillation. *Circulation*. 2012;126:e143–6.
- 175 2 Brundel BJM, Ai X, Hills MT, *et al*. Atrial fibrillation. *Nat Rev Dis Primers*. 2022;8:1–23. doi:  
176 10.1038/s41572-022-00347-9
- 177 3 Artucio H, Pereira M. Cardiac arrhythmias in critically ill patients: epidemiologic study. *Crit Care*  
178 *Med*. 1990;18:1383–8.
- 179 4 Shaver CM, Chen W, Janz DR, *et al*. Atrial fibrillation is an independent predictor of mortality in  
180 critically ill patients. *Crit Care Med*. 2015;43:2104–11.
- 181 5 Seguin P, Launey Y. Atrial fibrillation is not just an artefact in the ICU. *Crit Care*. 2010;14:182.
- 182 6 Kanji S, Williamson DR, Yaghchi BM, *et al*. Epidemiology and management of atrial fibrillation in  
183 medical and noncardiac surgical adult intensive care unit patients. *Journal of Critical Care*.  
184 2012;27:326.e1-326.e8.
- 185 7 Salman S, Bajwa A, Gajic O, *et al*. Paroxysmal atrial fibrillation in critically ill patients with sepsis. *J*  
186 *Intensive Care Med*. 2008;23:178–83.
- 187 8 Ruddox V, Sandven I, Munkhaugen J, *et al*. Atrial fibrillation and the risk for myocardial infarction,  
188 all-cause mortality and heart failure: A systematic review and meta-analysis. *Eur J Prev Cardiol*.  
189 2017;24:1555–66.
- 190 9 Yoshida T, Fujii T, Uchino S, *et al*. Epidemiology, prevention, and treatment of new-onset atrial  
191 fibrillation in critically ill: a systematic review. *J Intensive Care*. 2015;3:19.

- 192 10 Moss TJ, Calland JF, Enfield KB, *et al.* New-Onset Atrial Fibrillation in the Critically Ill. *Crit Care*  
193 *Med.* 2017;45:790–7.
- 194 11 Bosch NA, Cimini J, Walkey AJ. Atrial Fibrillation in the ICU. *Chest.* 2018;154:1424–34.
- 195 12 Seguin P, Laviolle B, Maurice A, *et al.* Atrial fibrillation in trauma patients requiring intensive  
196 care. *Intensive Care Med.* 2006;32:398–404.
- 197 13 Sibley S, Muscedere J. New-onset atrial fibrillation in critically ill patients. *Can Respir J.*  
198 2015;22:179–82.
- 199 14 Drikite L, Bedford JP, O’Bryan L, *et al.* Treatment strategies for new onset atrial fibrillation in  
200 patients treated on an intensive care unit: a systematic scoping review. *Critical Care.*  
201 2021;25:257.
- 202 15 Wetterslev M, Møller MH, Granholm A, *et al.* Management of acute atrial fibrillation in the  
203 intensive care unit: An international survey. *Acta Anaesthesiologica Scandinavica.* 2022;66:375–  
204 85.
- 205 16 Rice TW, Wheeler AP, Bernard GR, *et al.* Comparison of the SpO<sub>2</sub>/FIO<sub>2</sub> ratio and the PaO<sub>2</sub>/FIO<sub>2</sub>  
206 ratio in patients with acute lung injury or ARDS. *Chest.* 2007;132:410–7.
- 207 17 ARDS Definition Task Force, Ranieri VM, Rubenfeld GD, *et al.* Acute respiratory distress  
208 syndrome: the Berlin Definition. *JAMA.* 2012;307:2526–33.
- 209 18 Sundbom MF, Sangfelt A, Lindgren E, *et al.* Respiratory and circulatory insufficiency during  
210 emergent long-distance critical care interhospital transports to tertiary care in a sparsely  
211 populated region: a retrospective analysis of late mortality risk. *BMJ Open.* 2022;12:e051217.
- 212 19 Fernando SM, Mathew R, Hibbert B, *et al.* New-onset atrial fibrillation and associated outcomes  
213 and resource use among critically ill adults—a multicenter retrospective cohort study. *Critical*  
214 *Care.* 2020;24:15.
- 215 20 Annane D, Sébille V, Duboc D, *et al.* Incidence and Prognosis of Sustained Arrhythmias in  
216 Critically Ill Patients. *Am J Respir Crit Care Med.* 2008;178:20–5.
- 217 21 Carrera P, Thongprayoon C, Cheungpasitporn W, *et al.* Epidemiology and outcome of new-onset  
218 atrial fibrillation in the medical intensive care unit. *Journal of Critical Care.* 2016;36:102–6.
- 219 22 Wetterslev M, Hylander Møller M, Granholm A, *et al.* Atrial Fibrillation (AFIB) in the ICU:  
220 Incidence, Risk Factors, and Outcomes: The International AFIB-ICU Cohort Study. *Critical Care*  
221 *Medicine.* ;10.1097/CCM.0000000000005883.
- 222 23 Wu C-S, Chen P-H, Chang S-H, *et al.* Atrial Fibrillation Is Not an Independent Determinant of  
223 Mortality Among Critically Ill Acute Ischemic Stroke Patients: A Propensity Score-Matched  
224 Analysis From the MIMIC-IV Database. *Frontiers in Neurology.* 2022;12.
- 225 24 Klein Klouwenberg PMC, Frencken JF, Kuipers S, *et al.* Incidence, Predictors, and Outcomes of  
226 New-Onset Atrial Fibrillation in Critically Ill Patients with Sepsis. A Cohort Study. *Am J Respir Crit*  
227 *Care Med.* 2017;195:205–11.
- 228 25 Brathwaite D, Weissman C. The new onset of atrial arrhythmias following major  
229 noncardiothoracic surgery is associated with increased mortality. *Chest.* 1998;114:462–8.
- 230 26 Reinelt P, Karth GD, Geppert A, *et al.* Incidence and type of cardiac arrhythmias in critically ill  
231 patients: a single center experience in a medical-cardiological ICU. *Intensive Care Med.*  
232 2001;27:1466–73.
- 233 27 Asfar P, Meziani F, Hamel J-F, *et al.* High versus Low Blood-Pressure Target in Patients with Septic  
234 Shock. *N Engl J Med.* 2014;370:1583–93.
- 235 28 Fleming GA, Murray KT, Yu C, *et al.* Milrinone Use is Associated With Postoperative Atrial  
236 Fibrillation Following Cardiac Surgery. *Circulation.* 2008;118:1619–25.
- 237 29 Feneck RO, Sherry KM, Withington PS, *et al.* Comparison of the hemodynamic effects of  
238 milrinone with dobutamine in patients after cardiac surgery. *J Cardiothorac Vasc Anesth.*  
239 2001;15:306–15.
- 240 30 Ergün B, Ergan B, Sözmen MK, *et al.* New-onset atrial fibrillation in critically ill patients with  
241 coronavirus disease 2019 (COVID-19). *Journal of Arrhythmia.* 2021;37:1196–204.

- 242 31 Paris S, Inciardi RM, Lombardi CM, *et al.* Implications of atrial fibrillation on the clinical course  
243 and outcomes of hospitalized COVID-19 patients: results of the Cardio-COVID-Italy multicentre  
244 study. *Europace*. 2021;23:1603–11.
- 245 32 Spinoni EG, Mennuni M, Rognoni A, *et al.* Contribution of Atrial Fibrillation to In-Hospital  
246 Mortality in Patients With COVID-19. *Circ Arrhythm Electrophysiol*. 2021;14:e009375.
- 247 33 Matsuura K, Ogino H, Matsuda H, *et al.* Impact of volume status on the incidence of atrial  
248 fibrillation following aortic arch repair. *Heart Vessels*. 2007;22:21–4.
- 249 34 Kalus JS, Caron MF, White CM, *et al.* Impact of fluid balance on incidence of atrial fibrillation  
250 after cardiothoracic surgery. *Am J Cardiol*. 2004;94:1423–5.

251

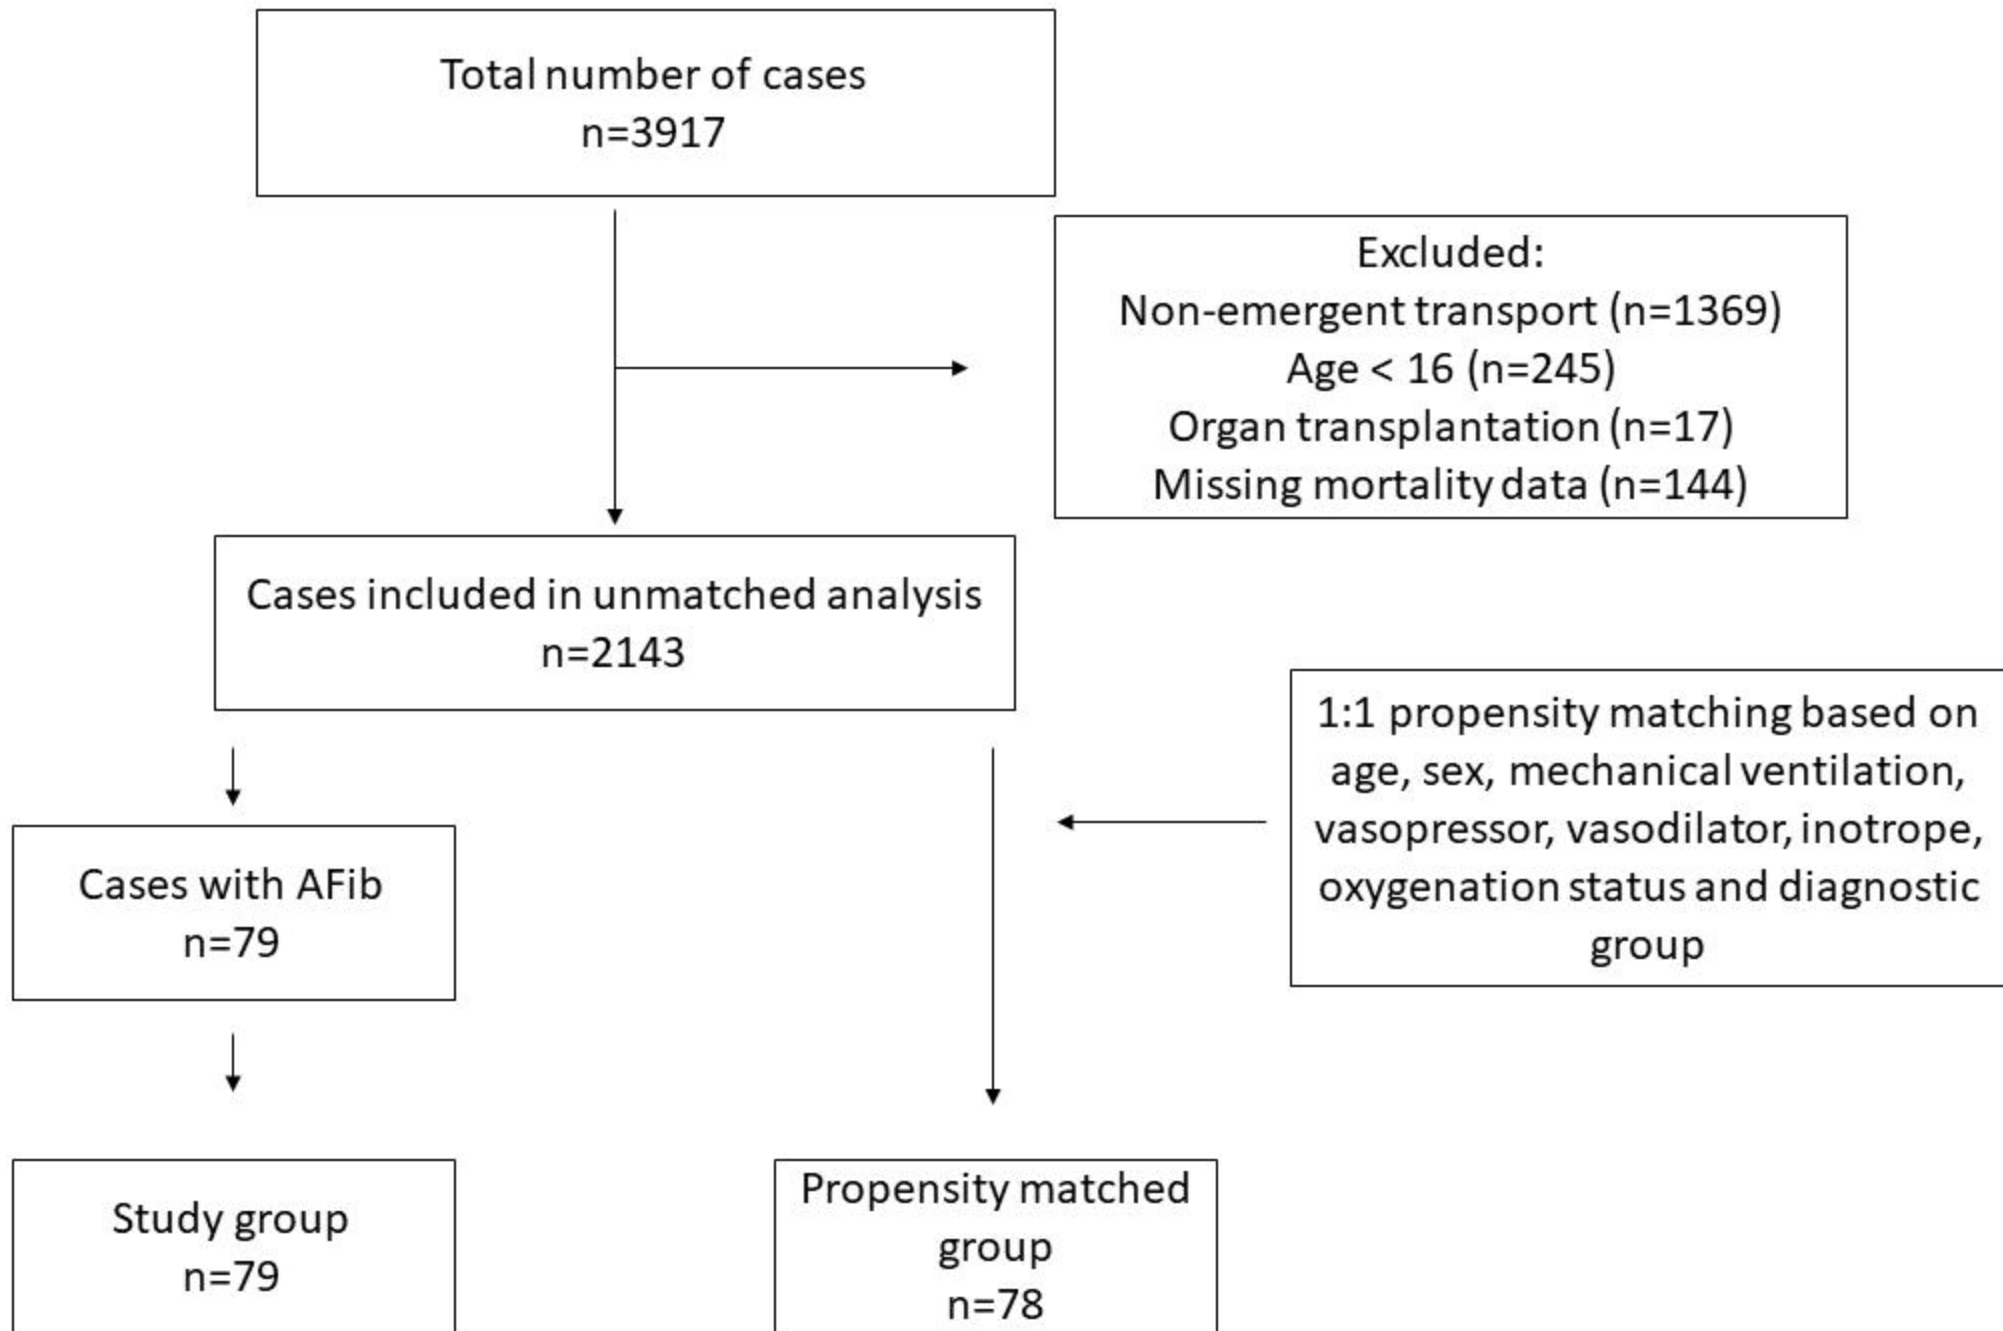

# Propensity score distribution

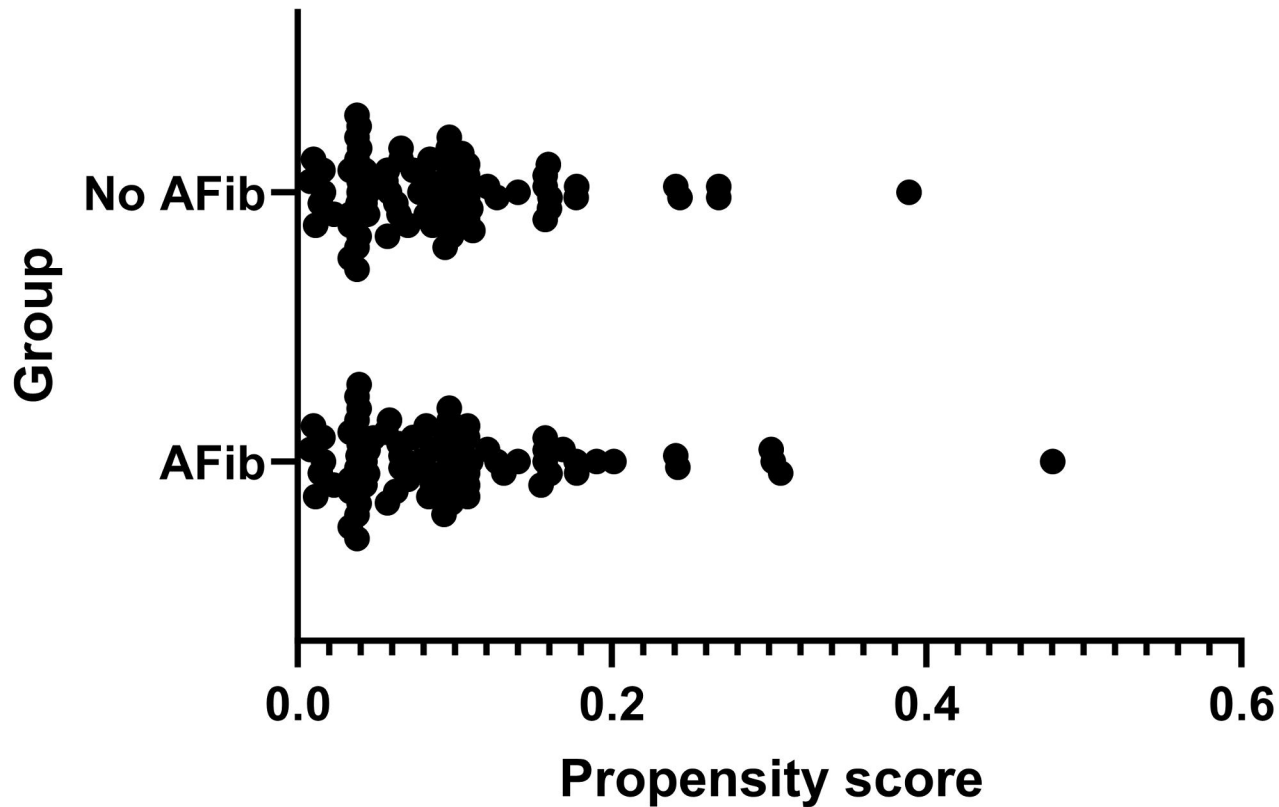

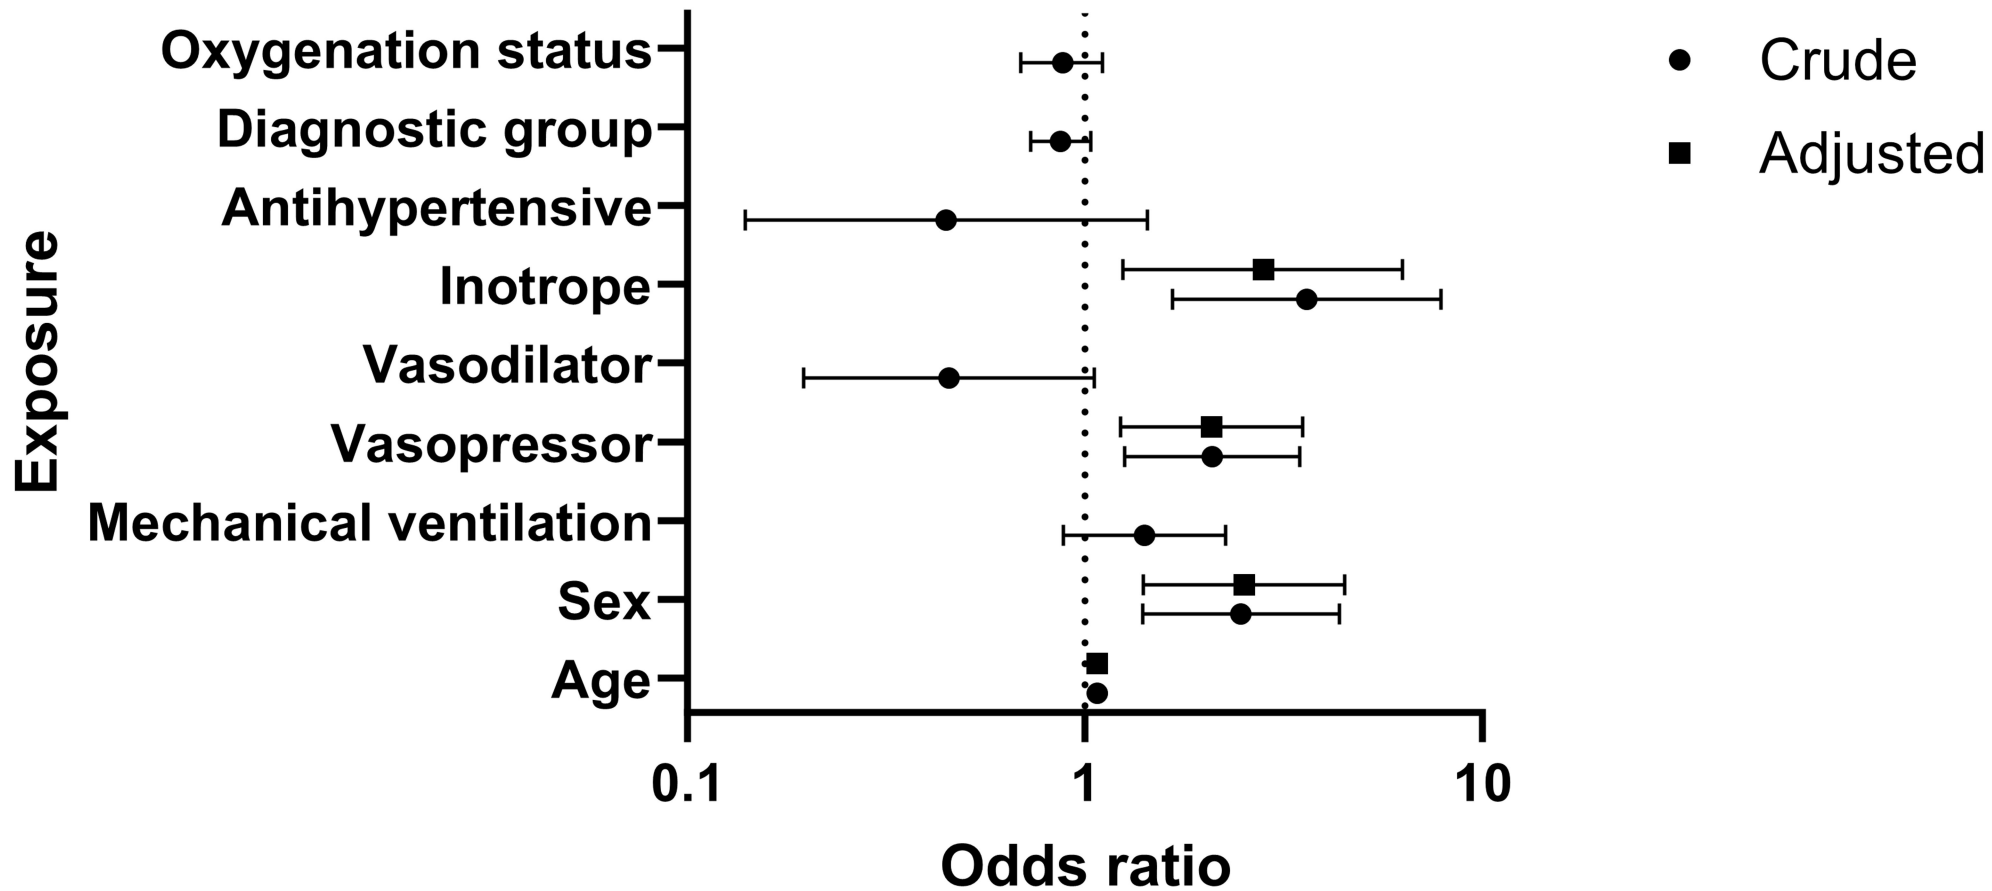

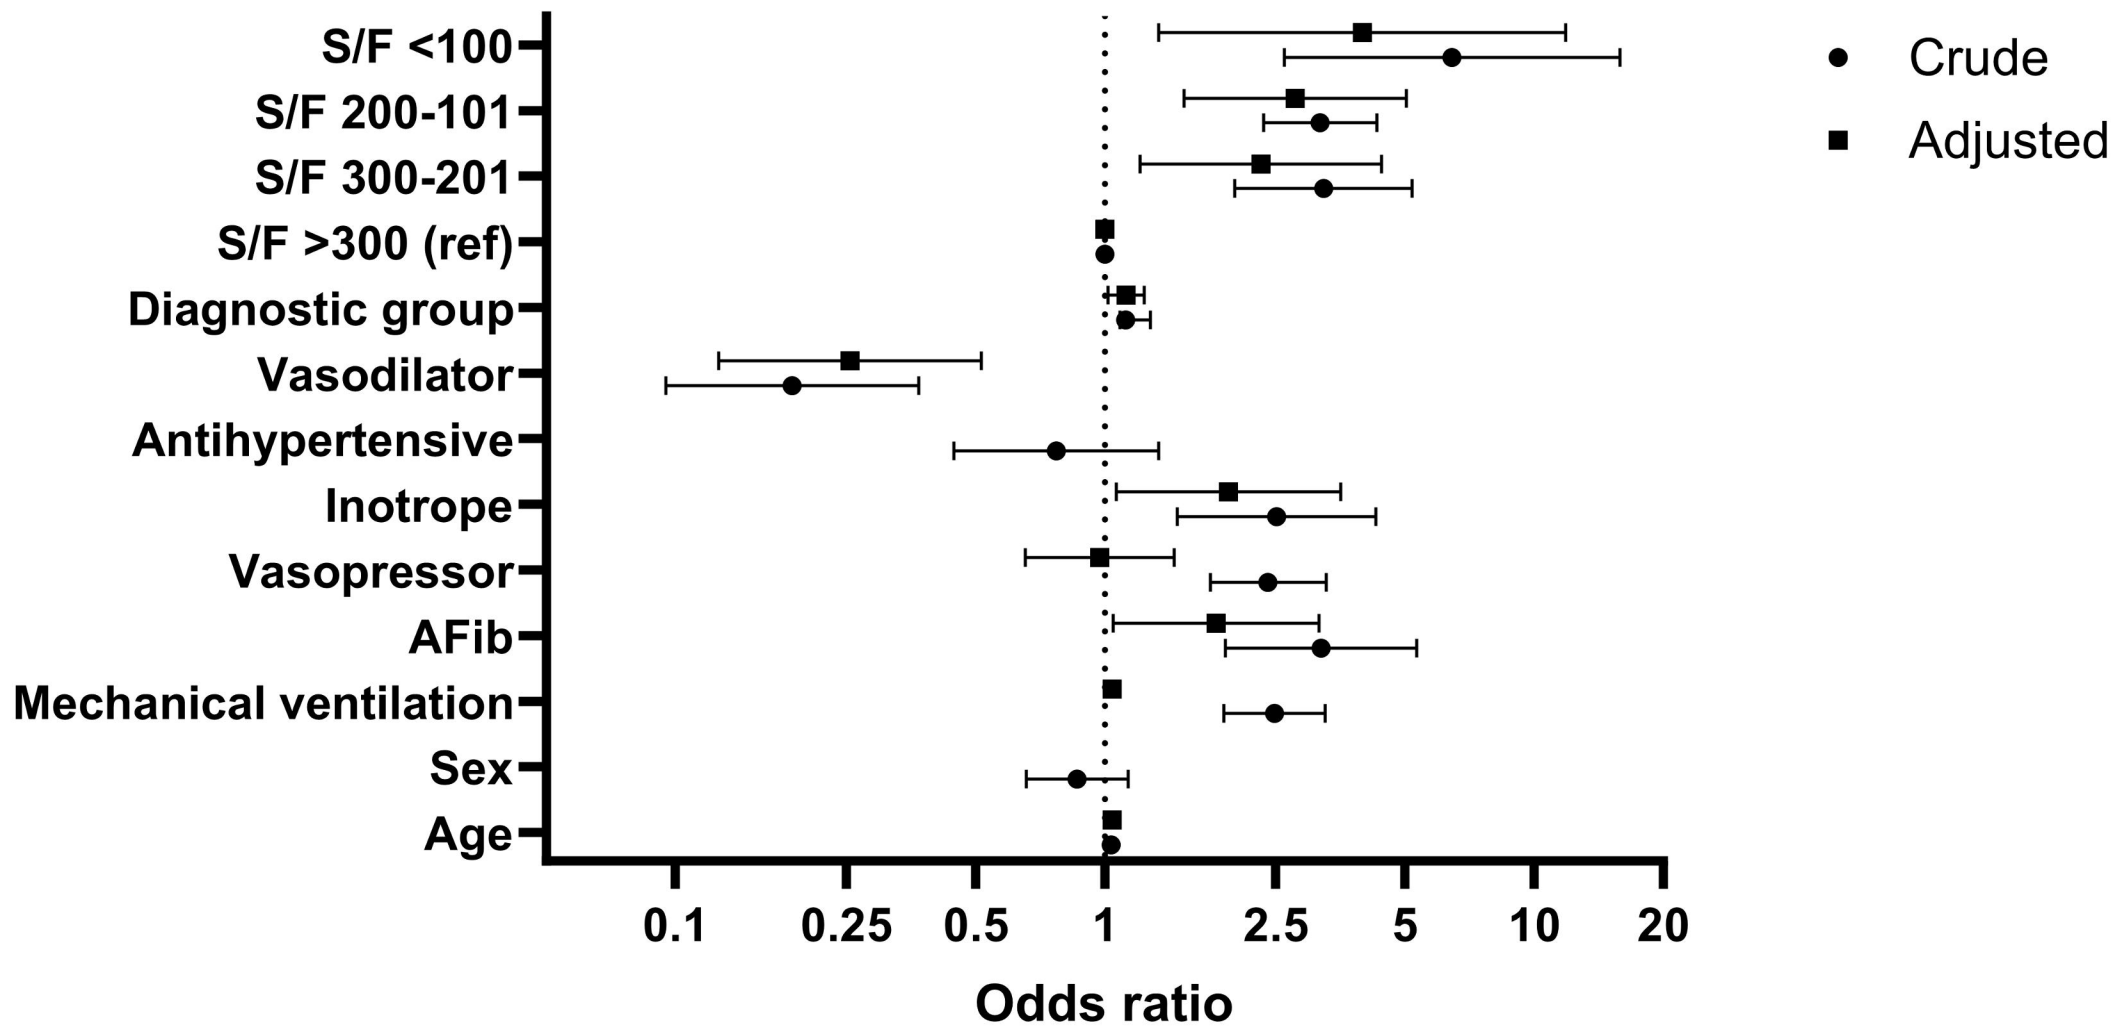

Source: https://www.medrxiv.org/content/10.1101/2024.04.13.24305714.full.pdf
